# Supplementary material for: Phylogenomic Analysis Reconstructed the Order Matoniales from Paleopolyploidy Veil
Source: MDPI journal article supplement (doi:10.3390/plants11121529), 2022-06-07
Supplement: s1 [file s1]

# One-to-One Orthologs Prediction

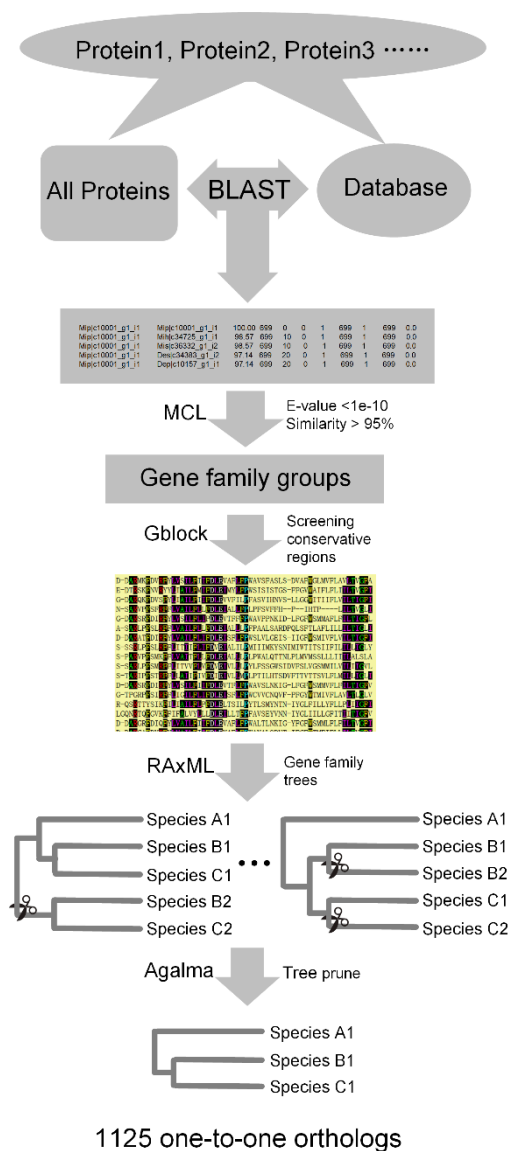

**Figure S1.** The pipeline of 1-to-1 orthologs prediction.

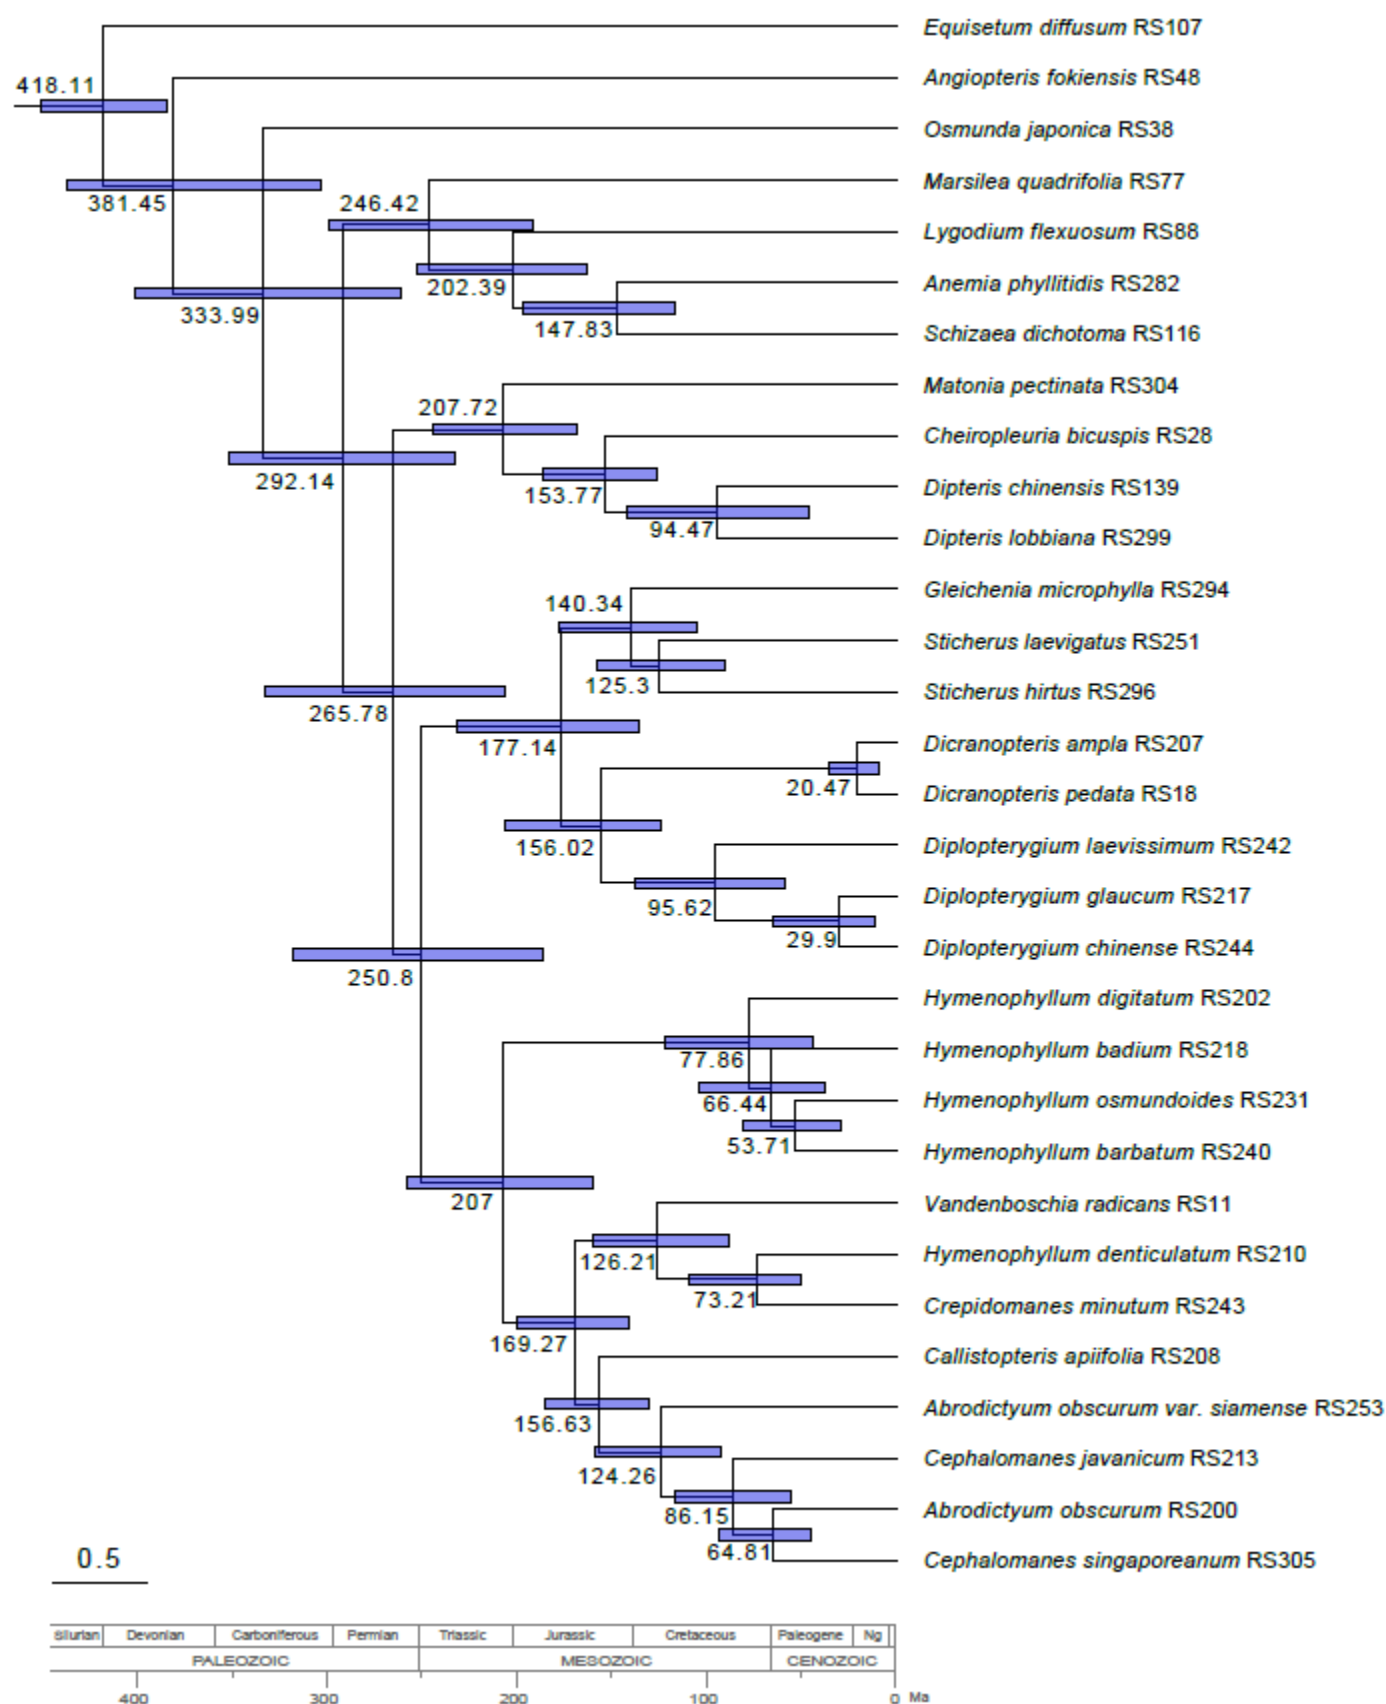

Figure S2. The timetree of early leptosporangiate ferns

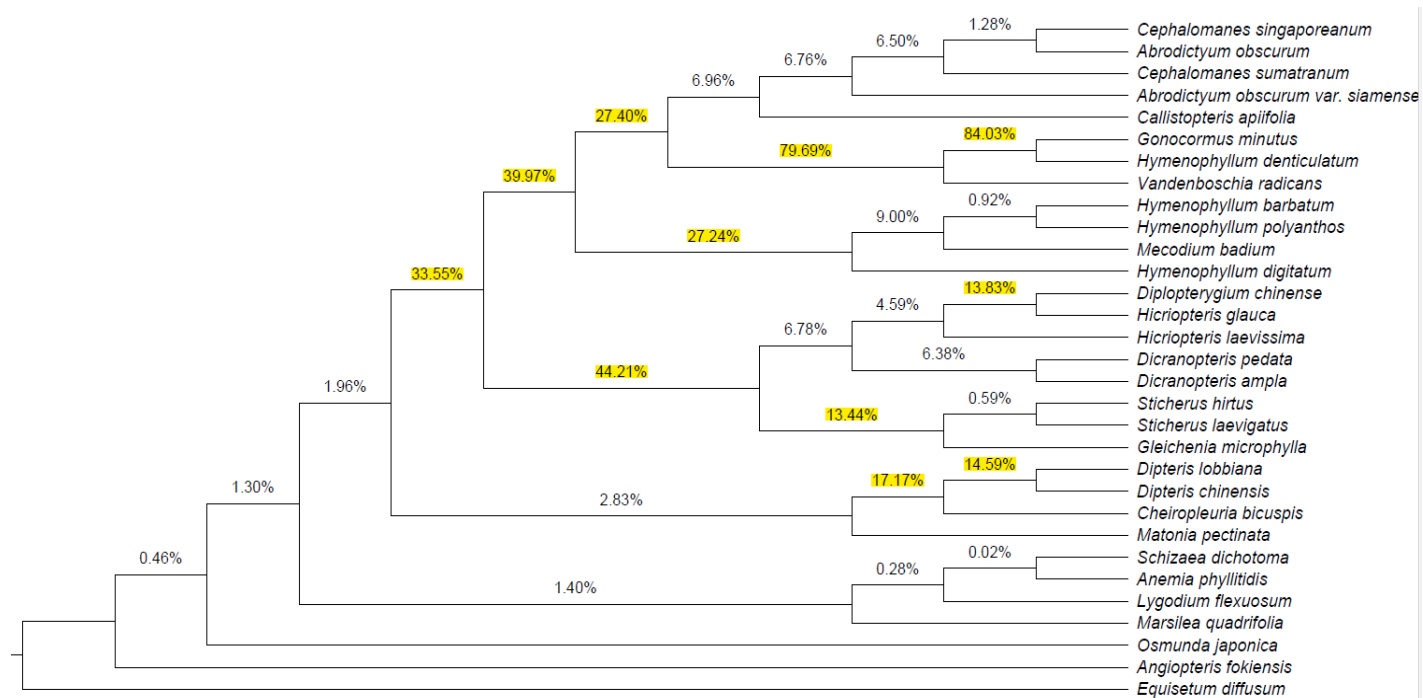

**Figure S3.** The inference of WGD events in early leptosporangiate ferns.

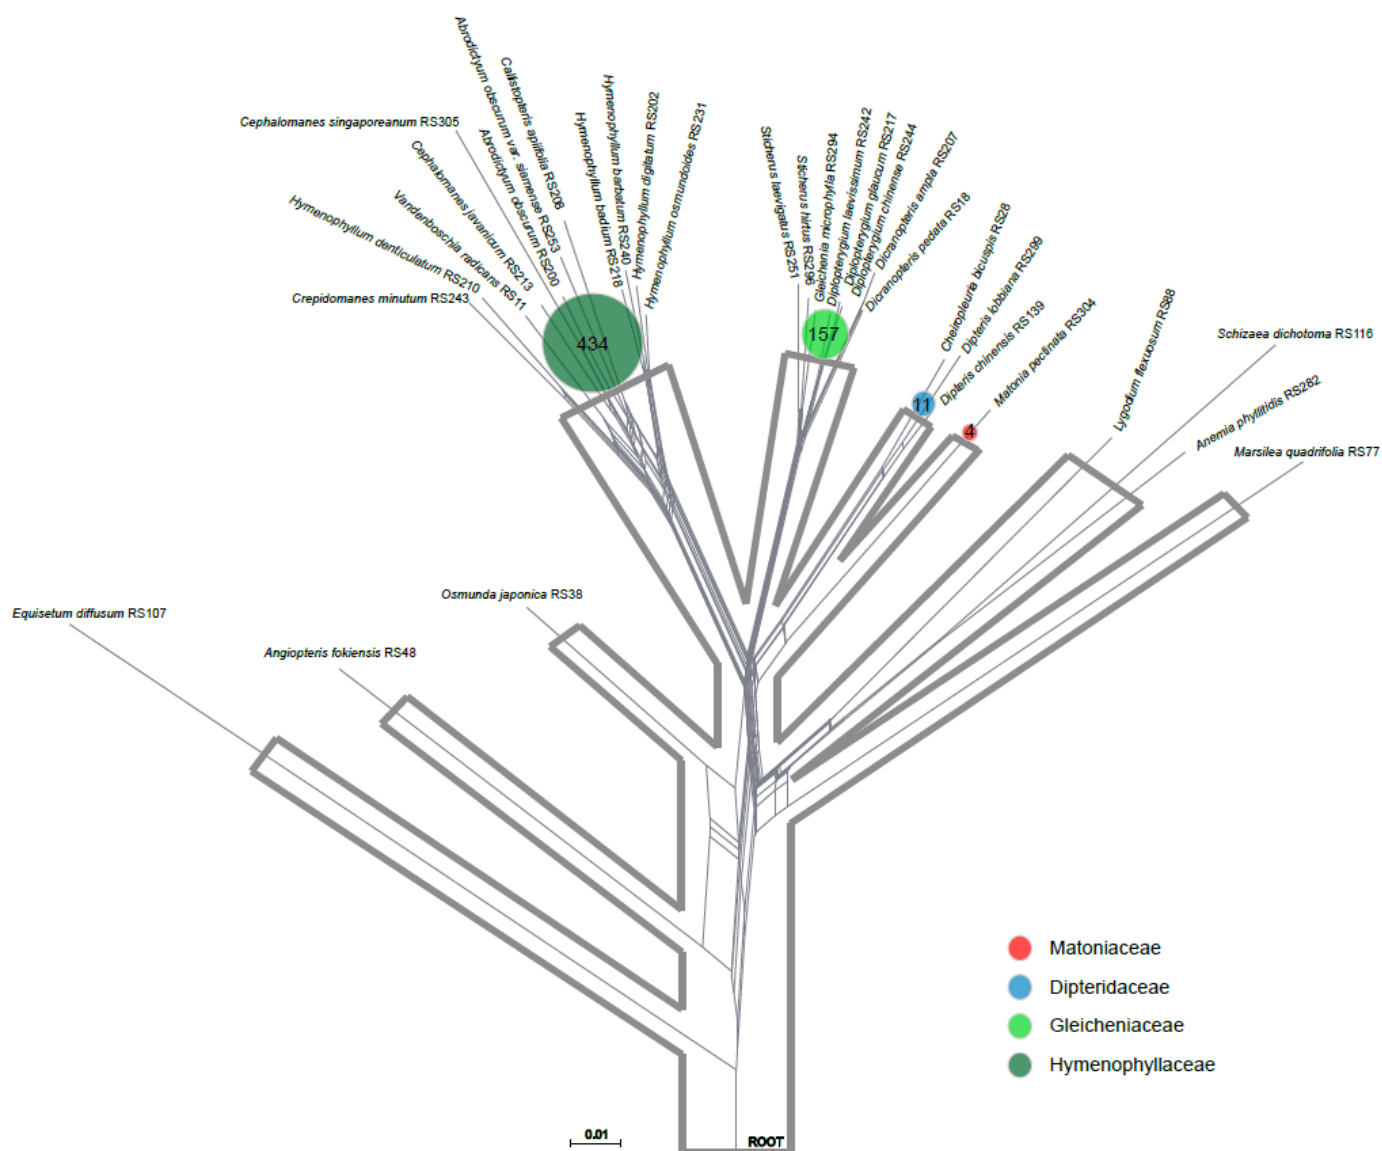

**Figure S4.** The rooted reticulate evolution in the early leptosporangiate ferns
