# Supplementary material for: Phylogenomic Analysis Reconstructed the Order Matoniales from Paleopolyploidy Veil
Source: MDPI journal article supplement (doi:10.3390/plants11121529), 2022-06-07
Supplement: s1 [file s1]

Table S1 Summary of main studies of the basal leptosporangiate ferns. (Gle: Gleicheniales; Hym: Hymenophyllales)

| Study                      | Phylogenetic depth     | Sampled |     |     | Data types                                                                                        | Methods            | Topology |
|----------------------------|------------------------|---------|-----|-----|---------------------------------------------------------------------------------------------------|--------------------|----------|
|                            |                        | Ferns   | Gle | Hym |                                                                                                   |                    |          |
| Hasebe et al. (1994)       | Leptosporangiate ferns | 58      | 5   | 3   | Plastid (rbcl)                                                                                    | NJ; MP             | Fig. 1A  |
| Hasebe et al. (1995)       | All ferns              | 107     | 6   | 6   | Plastid (rbcl)                                                                                    | NJ; MP; ML         | Fig. 1D  |
| Pryer et al. (1995)        | All ferns              | 50      | 5   | 1   | Plastid (rbcl); Morphology (77)                                                                   | MP                 | Fig. 1D  |
| Pryer et al. (2001)        | Vascular plants        | 21      | 2   | 1   | Plastid (3); Nuclear (18S rDNA); Morphology (136)                                                 | MP; ML             | Fig. 1A  |
| Pryer et al. (2004)        | All ferns              | 53      | 10  | 2   | Plastid (3); Nuclear (18S rDNA)                                                                   | MP; ML; BI         | Fig. 1C  |
| Schneider et al. (2004)    | All ferns              | 41      | 1   | 1   | Plastid (2)                                                                                       | BI                 | Fig. 1A  |
| Wikström & Pryer (2005)    | All ferns              | 20      | 2   | 1   | Plastid (3); Nuclear (18S rDNA); Mitochondrion (atp1); Morphology (138)                           | ML; BI             | Fig. 1A  |
| Qiu et al. (2006)          | Land plants            | 36      | 1   | 2   | Plastid (4); Nuclear (18S rDNA); Mitochondrion (LSU rDNA); cp genome (67); Genomic structure (28) | MP; ML             | Fig. 1A  |
| Schuettpelz et al. (2006)  | All ferns              | 52      | 9   | 2   | Plastid (4); Nuclear (18S rDNA)                                                                   | ML; BI             | Fig. 1A  |
| Schuettpelz & Pryer (2006) | All ferns              | 101     | 10  | 50  | Plastid (rbcl)                                                                                    | BI                 | Fig. 1A  |
| Qiu et al. (2007)          | Land plants            | 36      | 1   | 2   | Plastid (4); Nuclear (18S rDNA); Mitochondrion (2)                                                | ML                 | Fig. 1A  |
| Schuettpelz & Pryer (2007) | Leptosporangiate ferns | 400     | 11  | 28  | Plastid (3)                                                                                       | ML                 | Fig. 1A  |
| Rai & Graham (2010)        | Land plants            | 34      | 4   | 3   | Plastid (17)                                                                                      | MP; ML             | Fig. 1A  |
| Kuo et al. (2011)          | All ferns              | 78      | 3   | 2   | Plastid (3)                                                                                       | ML; BI             | Fig. 1F  |
| Lehtonen (2011)            | All ferns              | 2656    | 35  | 168 | Plastid (4)                                                                                       | ML                 | Fig. 1A  |
| Knie et al. (2015)         | All ferns              | 30      | 2   | 2   | Plastid (5); Mitochondrion (4)                                                                    | ML                 | Fig. 1B  |
| Rothfels et al. (2015)     | All ferns              | 73      | 3   | 2   | Nuclear (25)                                                                                      | ML; BI; coalescent | Fig. 1D  |
| Testo et al. (2016)        | All ferns              | 3973    | 41  | 209 | Plastid (7)                                                                                       | ML                 | Fig. 1A  |
| Shen et al. (2018)         | All ferns              | 69      | 2   | 1   | Nuclear (2391/1334)                                                                               | ML; coalescent     | Fig. 1E  |
| Kuo et al. (2018)          | All ferns              | 26      | 2   | 2   | Plastid (71)                                                                                      | ML                 | Fig. 1A  |
| Qi et al. (2018)           | All ferns              | 127     | 8   | 6   | Nuclear (146)                                                                                     | ML; coalescent     | Fig. 1E  |
| Wolf et al. (2018)         | All ferns              | 24      | 1   | 1   | Nuclear (25)                                                                                      | ML                 | Fig. 1A  |

## Ref.

Hasebe, M., T. Otori, M. Nakazawa, T. Sano, M. Kato and K. Iwatsuki (1994). "rbcl gene sequences provide evidence for the evolutionary lineages of leptosporangiate ferns." Proceedings of the National Academy of Sciences **91**(12): 5730-5734.

Hasebe, M., P. G. Wolf, K. M. Pryer, K. Ueda, M. Ito, R. Sano, G. J. Gastony, J. Yokoyama, J. R. Manhart and N. Murakami (1995). "Fern phylogeny based on rbcL nucleotide sequences." American Fern Journal: 134-181.

- Knie, N., S. Fischer, F. Grewe, M. Polsakiewicz and V. Knoop (2015). "Horsetails are the sister group to all other monilophytes and Marattiales are sister to leptosporangiate ferns." Molecular Phylogenetics and Evolution **90**: 140-149.
- Kuo, L.-Y., F.-W. Li, W.-L. Chiou and C.-N. Wang (2011). "First insights into fern matK phylogeny." Molecular Phylogenetics and Evolution **59**(3): 556-566.
- Kuo, L. Y., X. Qi, H. Ma and F. W. Li (2018). "Order-level fern plastome phylogenomics: new insights from Hymenophyllales." American journal of botany **105**(9): 1545-1555.
- Lehtonen, S. (2011). "Towards resolving the complete fern tree of life." PLoS One **6**(10): e24851.
- Pryer, K. M., H. Schneider, A. R. Smith, R. Cranfill, P. G. Wolf, J. S. Hunt and S. D. Sipes (2001). "Horsetails and ferns are a monophyletic group and the closest living relatives to seed plants." Nature **409**(6820): 618.
- Pryer, K. M., E. Schuettpelz, P. G. Wolf, H. Schneider, A. R. Smith and R. Cranfill (2004). "Phylogeny and evolution of ferns (monilophytes) with a focus on the early leptosporangiate divergences." American journal of Botany **91**(10): 1582-1598.
- Pryer, K. M., A. R. Smith and J. E. Skog (1995). "Phylogenetic relationships of extant ferns based on evidence from morphology and rbcL sequences." American Fern Journal: 205-282.
- Qi, X., L.-Y. Kuo, C. Guo, H. Li, Z. Li, J. Qi, L. Wang, Y. Hu, J. Xiang and C. Zhang (2018). "A well-resolved fern nuclear phylogeny reveals the evolution history of numerous transcription factor families." Molecular phylogenetics and evolution **127**: 961-977.
- Qiu, Y.-L., L. Li, B. Wang, Z. Chen, O. Dombrovskaya, J. Lee, L. Kent, R. Li, R. W. Jobson and T. A. Hendry (2007). "A nonflowering land plant phylogeny inferred from nucleotide sequences of seven chloroplast, mitochondrial, and nuclear genes." International Journal of Plant Sciences **168**(5): 691-708.
- Qiu, Y.-L., L. Li, B. Wang, Z. Chen, V. Knoop, M. Groth-Malonek, O. Dombrovskaya, J. Lee, L. Kent and J. Rest (2006). "The deepest divergences in land plants inferred from phylogenomic evidence." Proceedings of the National Academy of Sciences **103**(42): 15511-15516.
- Rai, H. S. and S. W. Graham (2010). "Utility of a large, multigene plastid data set in inferring higher-order relationships in ferns and relatives (monilophytes)." American Journal of Botany **97**(9): 1444-1456.
- Rothfels, C. J., F. W. Li, E. M. Sigel, L. Huiet, A. Larsson, D. O. Burge, M. Ruhsam, M. Deyholos, D. E. Soltis and C. N. Stewart Jr (2015). "The evolutionary history of ferns inferred from 25 low-copy nuclear genes." American Journal of Botany **102**(7): 1089-1107.
- Schneider, H., E. Schuettpelz, K. M. Pryer, R. Cranfill, S. Magallón and R. Lupia (2004). "Ferns diversified in the shadow of angiosperms." Nature **428**(6982): 553.
- Schuettpelz, E., P. Korall and K. M. Pryer (2006). "Plastid atpA data provide improved support for deep relationships among ferns." Taxon **55**(4): 897-906.
- Schuettpelz, E. and K. M. Pryer (2006). "Reconciling extreme branch length differences: decoupling time and rate through the evolutionary history of filmy ferns." Systematic Biology **55**(3): 485-502.
- Schuettpelz, E. and K. M. Pryer (2007). "Fern phylogeny inferred from 400 leptosporangiate species and three plastid genes." Taxon **56**(4): 1037-1050.
- Shen, H., D. Jin, J.-P. Shu, X.-L. Zhou, M. Lei, R. Wei, H. Shang, H.-J. Wei, R. Zhang, L. Liu, Y.-F. Gu, X.-C. Zhang and Y.-H. Yan (2017). "Large-scale phylogenomic analysis resolves a backbone phylogeny in ferns." GigaScience **7**(2).
- Testo, W. and M. Sundue (2016). "A 4000-species dataset provides new insight into the evolution of ferns." Molecular Phylogenetics and Evolution **105**: 200-211.
- Wikström, N. and K. M. Pryer (2005). "Incongruence between primary sequence data and the distribution of a mitochondrial atp1 group II intron among ferns and horsetails." Molecular Phylogenetics and Evolution

**36**(3): 484-493.

Wolf, P. G., T. A. Robison, M. G. Johnson, M. A. Sundue, W. L. Testo and C. J. Rothfels (2018). "Target sequence capture of nuclear-encoded genes for phylogenetic analysis in ferns." Applications in plant sciences **6**(5): e01148.
