# Supplementary material for: Phylogenomic Analysis Reconstructed the Order Matoniales from Paleopolyploidy Veil
Source: MDPI journal article supplement (doi:10.3390/plants11121529), 2022-06-07
Supplement: s1 [file s1]

Table S2. The informations of samples and transcriptome data used in this study.

| Samples ID | Species                                          | Family           | Clean data (G) | Total reads (clean) | Q30 (%) | Number of contigs | N50 (bp) | Mean (bp) |
|------------|--------------------------------------------------|------------------|----------------|---------------------|---------|-------------------|----------|-----------|
| RS11       | <i>Vandenboschia radicans</i>                    | Hymenophyllaceae | 4.8            | 38639790            | 90.3    | 273743            | 625      | 486.12    |
| RS18       | <i>Dicranopteris pedata</i>                      | Gleicheniaceae   | 4.2            | 33942120            | 92.04   | 75259             | 1435     | 829.01    |
| RS28       | <i>Cheiropleuria bicuspis</i>                    | Dipteridaceae    | 5.1            | 41617294            | 91.35   | 143200            | 1954     | 1182.58   |
| RS38       | <i>Osmunda japonica</i>                          | Osmundaceae      | 4.1            | 33485274            | 92.05   | 66318             | 2109     | 1163.17   |
| RS48       | <i>AnGIOpteris fokiensis</i>                     | AnGIOpteridaceae | 4.4            | 35120302            | 91.12   | 63003             | 1904     | 1188.75   |
| RS77       | <i>Marsilea quadrifolia</i>                      | Marsileaceae     | 4.3            | 34724432            | 91.76   | 85761             | 2045     | 1311.10   |
| RS88       | <i>Lygodium flexuosum</i>                        | Lygodiaceae      | 4.2            | 34098316            | 91.44   | 94774             | 2003     | 1253.49   |
| RS107      | <i>Equisetum diffusum</i>                        | Equisetaceae     | 4.4            | 35693238            | 90.21   | 117880            | 1704     | 908.40    |
| RS116      | <i>Schizaea dichotoma</i>                        | Schizaeaceae     | 4.5            | 36668734            | 89.6    | 70687             | 1585     | 1018.15   |
| RS139      | <i>Dipteris chinensis</i>                        | Dipteridaceae    | 9.4            | 63997114            | 94.65   | 126520            | 2117     | 1151.61   |
| RS200      | <i>Abrodictyum obscurum</i>                      | Hymenophyllaceae | 9.3            | 63065130            | 94.77   | 119181            | 2273     | 1182.73   |
| RS202      | <i>Hymenophyllum digitatum</i>                   | Hymenophyllaceae | 8.0            | 54129212            | 95.41   | 184930            | 867      | 553.72    |
| RS207      | <i>Dicranopteris ampla</i>                       | Gleicheniaceae   | 9.6            | 65013104            | 95.65   | 76029             | 1521     | 975.60    |
| RS208      | <i>Callistopteris apiifolia</i>                  | Hymenophyllaceae | 8.5            | 58206276            | 95.27   | 685642            | 435      | 438.86    |
| RS210      | <i>Hymenophyllum denticulatum</i>                | Hymenophyllaceae | 9.1            | 61421476            | 95.18   | 124284            | 2144     | 1247.54   |
| RS213      | <i>Cephalomanes javanicum</i>                    | Hymenophyllaceae | 8.1            | 54990600            | 95.07   | 92514             | 2196     | 1192.94   |
| RS217      | <i>Diplopterygium glaucum</i>                    | Gleicheniaceae   | 10.8           | 73301566            | 94.98   | 255509            | 1682     | 817.10    |
| RS218      | <i>Hymenophyllum badium</i>                      | Hymenophyllaceae | 9.2            | 62303336            | 94.87   | 256540            | 1697     | 895.66    |
| RS231      | <i>Hymenophyllum osmundoides</i>                 | Hymenophyllaceae | 10.0           | 67318452            | 95.54   | 161621            | 1618     | 795.13    |
| RS240      | <i>Hymenophyllum barbatum</i>                    | Hymenophyllaceae | 9.0            | 60903248            | 95.14   | 257884            | 1536     | 759.24    |
| RS242      | <i>Diplopterygium laevissimum</i>                | Gleicheniaceae   | 9.5            | 64492260            | 95.05   | 107038            | 2177     | 1278.81   |
| RS243      | <i>Crepidomanes minutum</i>                      | Hymenophyllaceae | 9.2            | 61799022            | 95.47   | 183181            | 1882     | 927.47    |
| RS244      | <i>Diplopterygium chinense</i>                   | Gleicheniaceae   | 10.4           | 70702896            | 95.29   | 164858            | 2021     | 1022.95   |
| RS251      | <i>Sticherus laevigatus</i>                      | Gleicheniaceae   | 8.6            | 58197742            | 95.97   | 154701            | 2277     | 1240.72   |
| RS253      | <i>Abrodictyum obscurum</i> var. <i>siamense</i> | Hymenophyllaceae | 7.5            | 51437264            | 91.96   | 98928             | 2119     | 1057.03   |
| RS282      | <i>Anemia phyllitidis</i>                        | Anemiaceae       | 7.4            | 49991062            | 95.86   | 186139            | 1813     | 900.36    |
| RS294      | <i>Gleichenia microphylla</i>                    | Gleicheniaceae   | 15.5           | 104739352           | 88.79   | 150169            | 1863     | 941.13    |
| RS296      | <i>Sticherus hirtus</i>                          | Gleicheniaceae   | 12.1           | 81606118            | 90.42   | 107200            | 2173     | 1274.65   |
| RS299      | <i>Dipteris lobbiana</i>                         | Dipteridaceae    | 12.9           | 86315908            | 92.33   | 391485            | 1461     | 790.88    |
| RS304      | <i>Matonia pectinata</i>                         | Matoniaceae      | 8.3            | 55132016            | 90.84   | 162856            | 2060     | 1023.26   |
| RS305      | <i>Cephalomanes singaporeanum</i>                | Hymenophyllaceae | 7.4            | 49190052            | 91.24   | 634401            | 746      | 568.78    |
